# Supplementary material for: Development of an antibody fragment that stabilizes GPCR/G-protein complexes
Source: PubMed Central journal article supplement (PMC6137068; doi:10.1038/s41467-018-06002-w), 2018-09-13
Supplement: 41467_2018_6002_MOESM1_ESM.pdf [file 41467_2018_6002_MOESM1_ESM.pdf]

Supplementary Information

Development of an antibody fragment that stabilizes GPCR/G-protein complexes

Maeda et al.

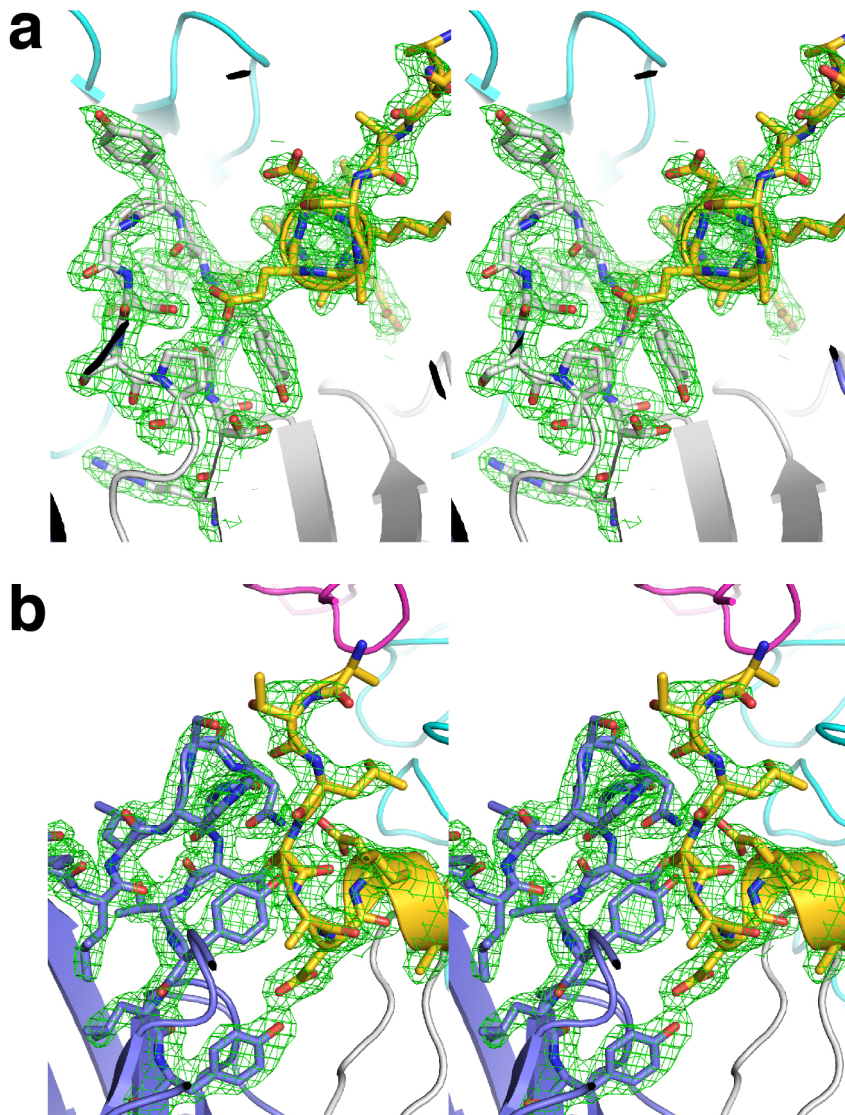

**Supplementary Figure 1. Electron density map.** Stereo view of the electron density map of **(a)** CDR-H3/ $\alpha$ N helix interface and **(b)** CDR-L1/ $\alpha$ N helix. The electron density is shown as green mesh contoured at  $1.5\sigma$ . Color scheme is the same as in the main text, and the residues are described as cartoon and sticks in the density map.

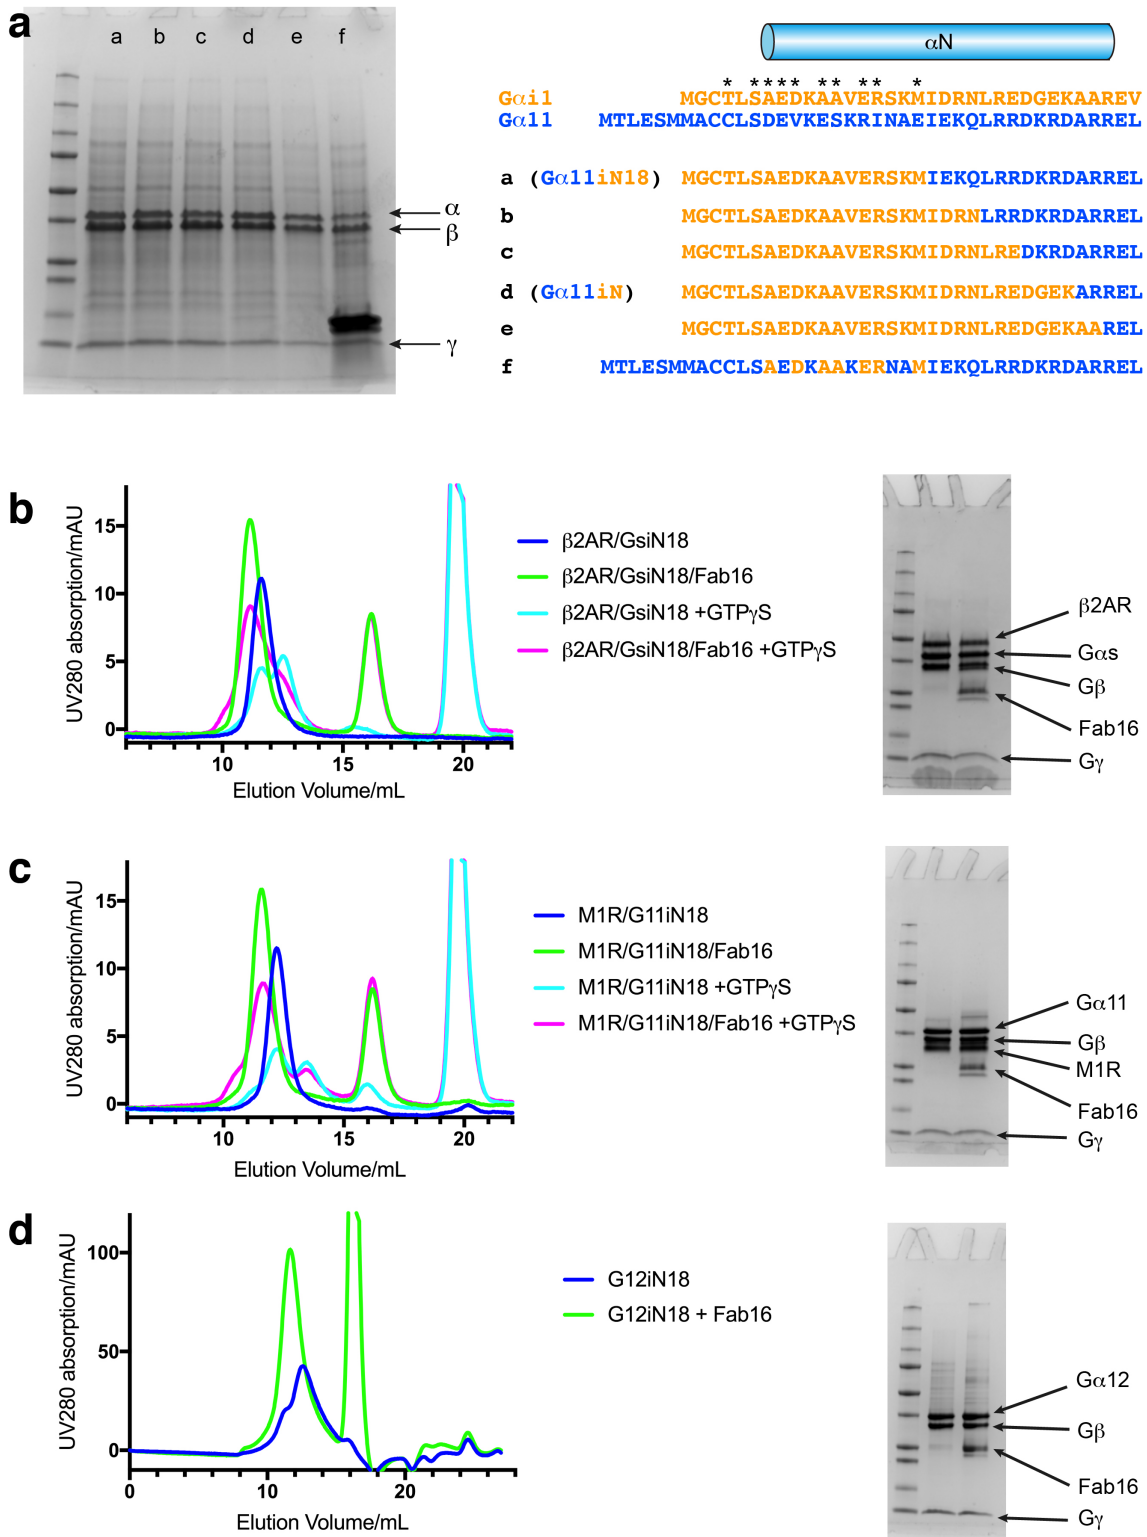

**Supplementary Figure 2. Minimal chimera constructs for G $_s$ , G $_{11}$ , and G $_{12}$ .** (a) Left: Coomassie stained SDS-PAGE gel of chimera constructs co-expressed with G $\beta\gamma$ . Proteins were purified from the solubilized lysate by Ni-affinity chromatography. The bands corresponding each subunit are labeled. Right: Sequences of the designed

chimeras corresponding to the labels in the SDS-PAGE. Region of  $\alpha$ N helix is shown as a cylinder and the residues interacting with scFv16 are marked with the asterisks. **(b, c)** Analytical SEC of  $\beta$ 2AR/ $G_{siN18}$  and  $M_1R/G_{11iN18}$  complexes incubated with GTP $\gamma$ S in the presence or absence of Fab16. Coomassie-stained SDS-PAGE gels of peak fractions corresponding to the  $\beta$ 2AR/ $G_{siN18}$  or  $M_1R/G_{11iN18}$  alone (middle lane), and  $\beta$ 2AR/ $G_{siN18}$ /Fab16 or  $M_1R/G_{11iN18}$ /Fab16 (right lane). **(d)** Analytical SEC of  $G_{12iN18}$  in the presence or absence of Fab16. Coomassie-stained SDS-PAGE gels of peak fractions corresponding to  $G_{12iN18}$  alone (middle lane), and  $G_{12iN18}$  /Fab16 (right lane).

|     |                                                                                                                   |     |
|-----|-------------------------------------------------------------------------------------------------------------------|-----|
| Gβ1 | -----MSELDQLRQE                                                                                                   | 10  |
| Gβ2 | -----MSELEQLRQE                                                                                                   | 10  |
| Gβ3 | -----MGEMEQLRQE                                                                                                   | 10  |
| Gβ4 | -----MSELEQLRQE                                                                                                   | 10  |
| Gβ5 | MCDQTFVLVNVFGSCDKCFKQRALRPVFKKSQQLSYCSTCAEIMATEGLHENETLASLKSE                                                     | 60  |
|     |                                                                                                                   |     |
| Gβ1 | AEQLKNQIRDARKACADATLSQITNNIDPVGRIQMRTRRTLRGHLAKIYAMHWGTD <b>S</b> RLL                                             | 70  |
| Gβ2 | AEQLRNQIRDARKACGDSTLTQITAGLDPVGRIQMRTRRTLRGHLAKIYAMHWGTD <b>S</b> RLL                                             | 70  |
| Gβ3 | AEQLKKQIADARKACADVTLAELVSGLEVVGRVQMRTRRTLRGHLAKIYAMHWATD <b>S</b> KLL                                             | 70  |
| Gβ4 | AEQLRNQIQDARKACNDATLVQITSNMDSVGRIQMRTRRTLRGHLAKIYAMHWGYD <b>S</b> RLL                                             | 70  |
| Gβ5 | AESLKGKLEERAKLHDVELHQVAERVEALGQFVMKTRRTLKGHGKVL <b>C</b> MDWCKDK <b>R</b> RI                                      | 120 |
|     |                                                                                                                   |     |
| Gβ1 | VSASQDGKLIWDSYTTNK <b>V</b> HAIPLRSSWVMTCAYAPSGNYVACGGLDNIC <b>S</b> IYNLKT <b>R</b> E                            | 130 |
| Gβ2 | VSASQDGKLIWDSYTTNK <b>V</b> HAIPLRSSWVMTCAYAPSGNFVACGGLDNIC <b>S</b> IYSLKT <b>R</b> E                            | 130 |
| Gβ3 | VSASQDGKLIWDSYTTNK <b>V</b> HAIPLRSSWVMTCAYAPSGNFVACGGLDNM <b>C</b> S IYNLKS <b>R</b> E                           | 130 |
| Gβ4 | VSASQDGKLIWDSYTTNK <b>M</b> HAIPLRSSWVMTCAYAPSGNYVACGGLDNIC <b>S</b> IYNLKT <b>R</b> E                            | 130 |
| Gβ5 | VSSSQDGKVIWDSFTTN <b>K</b> E <b>H</b> AVTMPCTWVMACAYAPSGCAIACGGLDNK <b>C</b> SVYPL <b>T</b> FD <b>K</b>           | 180 |
|     |                                                                                                                   |     |
| Gβ1 | <b>G</b> N--VRVSRELAGHTGYLSCCRFLD-DNQIVTSSGD <b>T</b> TCALWDIETGQ <b>Q</b> TTTTFTGHTGDV                           | 187 |
| Gβ2 | <b>G</b> N--VRVSRELPGHTGYLSCCRFLD-DNQIITSSGD <b>T</b> TCALWDIETGQ <b>Q</b> TVGFAGHSGDV                            | 187 |
| Gβ3 | <b>G</b> N--VKVSRELSAHTGYLSCCRFLD-DNNIVTSSGD <b>T</b> TCALWDIETGQ <b>Q</b> KTVFVGHTGDC                            | 187 |
| Gβ4 | <b>G</b> N--VRVSRELPGHTGYLSCCRFLD-DSQIVTSSGD <b>T</b> TCALWDIETAQ <b>Q</b> TTTTFTGHSGDV                           | 187 |
| Gβ5 | <b>N</b> ENMAAKKKS <b>V</b> AMHTNYLSACSFTNSDMQ <b>I</b> L <b>T</b> ASGDGTCALWDV <b>E</b> SGQL <b>L</b> QSFHGHGADV | 240 |
|     |                                                                                                                   |     |
| Gβ1 | MSLSLAPD--TRLFVSGACDASAKLWDVREGMC <b>R</b> Q <b>T</b> FTGHESDINAICFFPNGNAFATGS                                    | 245 |
| Gβ2 | MSLSLAPD--GRTFVSGACDASIKLWDV <b>R</b> DSMC <b>R</b> Q <b>T</b> FTGHESDINAVAFFPNGYAF <b>T</b> TGS                  | 245 |
| Gβ3 | MSLAVSPD--FNLFISGACDASAKLWDVREG <b>T</b> CR <b>Q</b> TFTGHESDINAICFFPN <b>G</b> EAI <b>C</b> TGS                  | 245 |
| Gβ4 | MSLSLSPD--MRTFVSGACDASSKLWDIRDGMC <b>R</b> Q <b>S</b> FTGHVSDINAVSFFPNGYAFATGS                                    | 245 |
| Gβ5 | LCLDLAPSETGNTFVSGGCDKKAMVWDMRSG <b>Q</b> C <b>V</b> QAF <b>E</b> THESDINSVRY <b>P</b> SGDAFASGS                   | 300 |
|     |                                                                                                                   |     |
| Gβ1 | DDATCRLFDL <b>R</b> ADQ <b>E</b> LMYSHDNIICGITSV <b>S</b> FSKSGRLLLAGYDDFNCNVWDAL <b>K</b> ADRA                   | 305 |
| Gβ2 | DDATCRLFDL <b>R</b> ADQ <b>E</b> LLMYSHDNIICGITSV <b>A</b> FSRSGRLLLAGYDDFNCNIWDAM <b>K</b> GDRA                  | 305 |
| Gβ3 | DDASCRLFDL <b>R</b> ADQ <b>E</b> LICFSHESIIICGITSV <b>A</b> FSLSGRLLFAGYDDFNCNVWDSM <b>K</b> SERV                 | 305 |
| Gβ4 | DDATCRLFDL <b>R</b> ADQ <b>E</b> LLLYSHDNIICGITSV <b>A</b> FSKSGRLLLAGYDDFNCNVWDTL <b>K</b> GDRA                  | 305 |
| Gβ5 | DDATCRLYDL <b>R</b> ADREVAI <b>Y</b> SKESII <b>F</b> GASSVDFSLSGRLLFAGYNDY <b>T</b> INVWDVL <b>K</b> GSRV         | 360 |
|     |                                                                                                                   |     |
| Gβ1 | GVLAGHDNRV <b>S</b> CLGVTDDGMAVATGSWDSFLKI <b>W</b> N                                                             | 340 |
| Gβ2 | GVLAGHDNRV <b>S</b> CLGVTDDGMAVATGSWDSFLKI <b>W</b> N                                                             | 340 |
| Gβ3 | GILSGHDNRV <b>S</b> CLGVTADGMAVATGSWDSFLKI <b>W</b> N                                                             | 340 |
| Gβ4 | GVLAGHDNRV <b>S</b> CLGVTDDGMAVATGSWDSFLRI <b>W</b> N                                                             | 340 |
| Gβ5 | SILFGHENRV <b>S</b> TLRVSPDG <b>T</b> AFCSGSWDHTLRV <b>A</b>                                                      | 395 |

**Supplementary Figure 3. Sequence alignment of G-protein β-subunits.** Multiple sequence alignment of Gβ subunit from human. The residues interacting with scFv16 in the crystal structure were shown with the black background.

**Heavy chain**

AB16\_HC MDSRLNLVFL VLTLKGVQCD VQLVESGGGL VQPGGSRKLS CSASGFAFSS FGMHWRQAP 60  
--leader sequence--- CDR1

AB16\_HC EKGLEWVAYI SSGSGTIYYA DTVKGRFTIS RDDPKNTLFL QMTSLRSEDY AMYYCVRSIY 120  
CDR2

AB16\_HC YYGSSPFDY WQGTTLTVS SAKTTPPSVY PLAPGCGDIT GSSVTLGCLV KGYFPESVTV 179  
CDR3 ---constant region-----

AB16\_HC SGPISTINPC PPKCECHKCP APNLEGGPSV FIFPPNIKDV LMISLTPKVT CVVVDVSEDD 299  
-----constant region-----

AB16\_HC PDVQISWVFN NVEVHTAQTQ THREDYNSTI RVVSTLPIQH QDWMSGKEFK CKVNNKDLPS 359  
-----constant region-----

AB16\_HC PIERTISKIK GLVRAPQVYI LPPPAEQLSR KDVSLTCLVV GFNPGDISVE WTSNGHTEEN 419  
-----constant region-----

AB16\_HC YKDTAPVLDS DGSYFIYSKL NMKTSKWEKT DSFSCNVRHE GLKNYYLKKT ISRSPGK 476  
-----constant region-----

**Light chain**

AB16\_LC MRCLAEFLGL LVLWIPGAIG DIVMTQATSS VPVTPGESVS ISCRSSKSL HSNGNTYLY 59  
---leader sequence--- -----CDR1-----

AB16\_LC WFLQRPGQSP QLLIYRMSNL ASGVPDRFSG SSGGTAFTLT ISRLEAEDVG VYYCMOHLEY 119  
--CDR2-- --CDR3

AB16\_LC PLTFGAGTKL ELKRADAAPT VSIFPPSSEQ LTSGGASVVC FLNNFYPKDI NVKWKIDGSE 179  
CDR3 -----constant region-----

AB16\_LC RQNGVLNSWT DQDSKDSTYS MSSTLTLTKD EYERHNSYTC EATHKTSTSP IVKSFNRNEC 239  
-----constant region-----

**Supplementary Note 1. Amino-acid sequence of mAb16.** Sequence of Heavy- and light-chain of mAb16 is provided. Leader sequence, CDRs, constant region is indicated under the amino-acid sequence.

## Supplementary Note 2 Amino acid sequences of the constructs used in the study

HA signal sequence highlighted in purple

FLAG-tag highlighted in cyan

His-tag highlighted in green

ICL3 highlighted in grey

Sequences from G $\alpha$ i1 colored in orange

### M1R

MKTIIALSYIFCLVFA<sup>HA</sup>DYKDDDD<sup>FLAG</sup>AAAQTSAPPAVSPQITVLAPGKGPWQVAFIGI  
TTGLLSLATVTGNLLVLISFKVNTTELKTVNNYFLLSLACADLIIGTFSMNLYTTY  
LLMGHWALGTLACDLWLALDYVASQASVMNLLLISFDRYFSVTRPLSYRAKR  
TPRRAALMIGLAWLVSFVLWAPAILFWQYLVGERTVLAGQCYIQFLSQPIITFG  
TAMAAFYLPVTVMCTLYWRIYRETENRARELAALQGSETPGGKEQLAKRKTFS  
LVKEKKAARTLSAILLAFILTWTPYNIMVLVSTFCKDCVPETLWELGYWLCYV  
NSTINPMCYALCNKAFRDTFRLLLLCRWDKRRWRKIPKRPGSVHRTPSRQC<sup>His</sup>  
<sup>His</sup>HHHH\*

### M2R

MKTIIALSYIFCLVFA<sup>HA</sup>DYKDDDD<sup>FLAG</sup>ASTDSSDNSLALTSPYLEKTFEVVFIVLVAGS  
LSLVTHIGNILVMVSIKVNRLHLQTVNNYFLFSLACADLIIGVFSMNLYTLYTVIGY  
WPLGPVCDLWLALDYVVSNASVMNLLIISFDRYFCVTKPLTYPVKRTTKMAG  
MMIAAAWVLSFILWAPAILFWQFIVGVRTVEDGECYIQFFSNAAVTFGTAAIAAF  
YLPVIIMTVLYWHISRASKSRIKKDKKEPVANQDPVSIVARKIVKMTKQPAKKK  
PPPSREKKVTRTILAILLAFIITWAPYNMVLINTFCAPCIPNTVWTIGYWLCYIN  
STINPACYALCNATFKKTFKLLMCHYKNIGATRPAG<sup>His</sup>HHHHHHHH\*

### G $\alpha$ iN

MGCTLSAEDKAA<sup>G $\alpha$ i1</sup>VERSKMIDRN<sup>G $\alpha$ i1</sup>REDGEKAA<sup>G $\alpha$ i1</sup>ATHRLLLLGAGESGKSTIVKQ  
MRILHVNGFNGDSEKATKVQDIKNNLKEAIETIVAAMSNLVPPVELANPENQFR  
VDYILSVMNVPDFDFPPEFYEHAKALWEDEGVRACYERSNEYQLIDCAQYFLD  
KIDVIKQADYVPSDQDLLRCRVLTSGIFETKFQVDKVNFMFDVGGQRDERRK  
WIQCFNDVTAIIFV<sup>G $\alpha$ i1</sup>ASSYNMVIREDNQTNRLQEALNLFKSIWNNRWLRTISVI

LFLNKQDLLAEKVLGKSKIEDYFPEFARYTTPEDATPEPGEDPRVTRAKYFIRD  
EFLRISTASGDGRHYCYPHFTCAVDTENIRRVFNDCRDIIQRMHLRQYELL\*

G $\alpha$ iN18

**MGCTLSAEDKAAVERSKM**IEKQLQKDKQVYRATHRLLLLGAGESGKSTIVKQ  
MRILHVNGFNVDSEKATKVDIKNNLKEAIETIVAAMSNLVPPVELANPENQFR  
VDYILSVMNVPDFDFPPEFYEHAKALWEDEGVRACYERSNEYQLIDCAQYFLD  
KIDVIKQADYVPSDQDLLRCRVLTSGIFETKFQVDKVNFMFDVGGQRDERRK  
WIQCFNDVTAIIFVVASSYNMVIREDNQTNRLQEALNLFKSIWNNRWLRTISVI  
LFLNKQDLLAEKVLGKSKIEDYFPEFARYTTPEDATPEPGEDPRVTRAKYFIRD  
EFLRISTASGDGRHYCYPHFTCAVDTENIRRVFNDCRDIIQRMHLRQYELL\*

G $\alpha$ 11iN18 (Construct **a** in Supplementary Figure 1a)

**MGCTLSAEDKAAVERSKM**IEKQLRRDKRDARRELKLLLLGTGESGKSTFIKQM  
RIIHGAGYSEEDKRGFTKL VYQNIFTAMQAMIRAMETLKILYKYEQNKANALLI  
REVDVEKVTTFEHQYVSAIKTLWEDPGIQECYDRRREYQLSDSAKYYLTDVDR  
IATLGYLPTQQDVL RVRVPTTGII EYPFDLENIIFRMVDVGGQRSERRKWIHCFE  
NVTSIMFLV ALSEYDQVLVESDNENRMEESKALFR TIITYPWFQNSSVILFLNKK  
DLLEDKILYSHLVDYFPEFDGPQRDAQAAREFILKMFVDLNPDSDKIIYSHFTCA  
TDTENIRFVFAAVKDTILQLNLKEYNLV\*

Construct **b** in Supplementary Figure 1a

**MGCTLSAEDKAAVERSKMIDRN**LRRDKRDARRELKLLLLGTGESGKSTFIKQM  
RIIHGAGYSEEDKRGFTKL VYQNIFTAMQAMIRAMETLKILYKYEQNKANALLI  
REVDVEKVTTFEHQYVSAIKTLWEDPGIQECYDRRREYQLSDSAKYYLTDVDR  
IATLGYLPTQQDVL RVRVPTTGII EYPFDLENIIFRMVDVGGQRSERRKWIHCFE  
NVTSIMFLV ALSEYDQVLVESDNENRMEESKALFR TIITYPWFQNSSVILFLNKK  
DLLEDKILYSHLVDYFPEFDGPQRDAQAAREFILKMFVDLNPDSDKIIYSHFTCA  
TDTENIRFVFAAVKDTILQLNLKEYNLV\*

Construct **c** in Supplementary Figure 1a

**MGCTLSAEDKAAVERSKMIDRN**LEDKRDARRELKLLLLGTGESGKSTFIKQM  
RIIHGAGYSEEDKRGFTKL VYQNIFTAMQAMIRAMETLKILYKYEQNKANALLI



REVDVEKVTTFEHQYVSAIKTLWEDPGIQECYDRRREYQLSDSAKYLLTDVDR  
IATLGYLPTQQDVLRLVRVPTTGIIIEYFPDLENIIFRMVDVGGQRSERRKWIHCFE  
NVTSIMFLValseyDQVLVESDNENRMEESKALFRTIITYPWFQNSSVILFLNKK  
DLLEDKILYSHLVDYFPEFDGPQRDAQAAREFILKMFVDLNPDSDKIIYSHFTCA  
TDTENIRFVFAAVKDTILQLNLKEYNLV\*

G $\alpha$ 11iN (Construct **d** in Supplementary Figure 1a)

**MGCTLSAEDKAAVERSKMIDRNLEDGEK**ARRELKLLLLGTGESGKSTFIKQM  
RIIHGAGYSEEDKRGFTKL VYQNIFTAMQAMIRAMETLKILYKYEQNKANALLI  
REVDVEKVTTFEHQYVSAIKTLWEDPGIQECYDRRREYQLSDSAKYLLTDVDR  
IATLGYLPTQQDVLRLVRVPTTGIIIEYFPDLENIIFRMVDVGGQRSERRKWIHCFE  
NVTSIMFLValseyDQVLVESDNENRMEESKALFRTIITYPWFQNSSVILFLNKK  
DLLEDKILYSHLVDYFPEFDGPQRDAQAAREFILKMFVDLNPDSDKIIYSHFTCA  
TDTENIRFVFAAVKDTILQLNLKEYNLV\*

Construct **e** in Supplementary Figure 1a

**MGCTLSAEDKAAVERSKMIDRNLEDGEKAA**RELKLLLLGTGESGKSTFIKQM  
RIIHGAGYSEEDKRGFTKL VYQNIFTAMQAMIRAMETLKILYKYEQNKANALLI  
REVDVEKVTTFEHQYVSAIKTLWEDPGIQECYDRRREYQLSDSAKYLLTDVDR  
IATLGYLPTQQDVLRLVRVPTTGIIIEYFPDLENIIFRMVDVGGQRSERRKWIHCFE  
NVTSIMFLValseyDQVLVESDNENRMEESKALFRTIITYPWFQNSSVILFLNKK  
DLLEDKILYSHLVDYFPEFDGPQRDAQAAREFILKMFVDLNPDSDKIIYSHFTCA  
TDTENIRFVFAAVKDTILQLNLKEYNLV\*

Construct **f** in Supplementary Figure 1a

MTLESMMACCLS**AEDKAAKER**NAMIEKQLRRDKRDARRELKLLLLGTGESGK  
STFIKQMRIIHGAGYSEEDKRGFTKL VYQNIFTAMQAMIRAMETLKILYKYEQN  
KANALLIREVDVEKVTTFEHQYVSAIKTLWEDPGIQECYDRRREYQLSDSAKY  
YLLTDVDRIATLGYLPTQQDVLRLVRVPTTGIIIEYFPDLENIIFRMVDVGGQRSERR  
KWIHCFENVTSIMFLValseyDQVLVESDNENRMEESKALFRTIITYPWFQNSS  
VILFLNKKDLLEDKILYSHLVDYFPEFDGPQRDAQAAREFILKMFVDLNPDSDKI  
IYSHFTCATDTENIRFVFAAVKDTILQLNLKEYNLV\*

Gα.12iN18

MGCTLSAEDKAAVERSKMIDALLARERRAVRRLVKILLLGAGESGKSTFLKQM  
RIIHGREFDQKALLEFRDTIFDNILKGSRVLVDARDKLGIPWQYSENEKHGMFL  
MAFENKAGLPVEPATFQLYVPALSALWRDSGIREAFSRRSEFQLGESVKYFLDN  
LDRIGQLNYFPSKQDILLARKATKGIVEHDFVIKKIPFKMVDVGGQRSQRQKWF  
QCFDGITSILFMVSSSEYDQVLMEDRRTNRLVESMNIFETIVNNKLFFNVSILFL  
NKMDLLVEKVKTVSIKKHFPDFRGDPHRLEDVQRYLVQCFDRKRRNRSKPLFH  
HFTTAIDTENVRFVFHAVKDTILQENLKDIMLQ\*

**Supplementary Table Primer sequences used in this study**

|                            |                                                    |
|----------------------------|----------------------------------------------------|
| M2R ICL3 extension primers |                                                    |
|                            | TCTTGACGATCTTGCGTGCAACGATGCTAACGGGGTCCTGGTTAGCCACC |
|                            | TGACTAAGCAACCTGCTAAGAAGAAGCCCCCTCCATCAAGGGAG       |
| M1R ICL3 extension primers |                                                    |
|                            | GGGCTGCCAGCTCCCGTGCTCGGTTCTCTGTCTCCCGGTAGATG       |
|                            | GCCTGGCGTCTCGGAGCCCTGAAGGGCTGCCAGCTCCCGTGCTCGG     |
|                            | AAGCGGAAGACCTTCTCGCTGGTCAAGGAGAAGAAGGCGGC          |
|                            | GGAAAGGAGCAGCTGGCCAAGCGGAAGACCTTCTCGCTGGTC         |
| GsiN primers               |                                                    |
|                            | GCTATAACTCGAGGAGCCTGCAGTCTCGAGGCATGCGGTACC         |
|                            | GGCGGTGCGTGGCCGCCGCTTCTCGCCGTCCTCACGG              |
|                            | GAAGGCGGCGGCCACGCACCGCCTGCTGCTGCTGGG               |
|                            | CGAGACTGCAGGCTCCTCGAGTTATAGCAGCTCGTACTGACG         |
| GsiN18 primers             |                                                    |
|                            | AAGGACAAGCAGGTCTACCGGGCCACGCACCGCCTGCTGCTGCTGGG    |
|                            | CTGCAGCTGCTTCTCGATCATCTTACTCCGCTCCACCG             |
| G11iN primers              |                                                    |
|                            | GGAGTACAACCTGGTCTGACTCGAGTCTAGAGCCTGCAGTCTCG       |
|                            | GGCTCTAGACTCGAGTCAGACCAGGTTGTACTCCTTGAGGTTGAGC     |
| Construct a                | CAGCTGCTTCTCGATCATCTTACTCCGCTCCACCGCC              |
|                            | GGAGTAAGATGATCGAGAAGCAGCTGCGGCGGGAC                |
| Construct b                | GCTTGTCGCGCCGCAGGTTGCGGTCGATCATCTTACTCCGC          |
|                            | GATCGACCGCAACCTGCGGCGGGACAAGCGCGACG                |
| Construct c                | CGTCGCGCTTGTCTCACGGAGGTTGCGGTCGATC                 |
|                            | GCAACCTCCGTGAGGACAAGCGCGACGCCCGGCGCG               |
| Construct d (G11iN18)      | GCTCGCGCCGGCCTTCTCGCCGTCCTCACGGAGG                 |
|                            | GGACGGCGAGAAGGCCCGGCGCGAGCTCAAGCTGC                |
| Construct e                | GCAGCTTGAGCTCGCGCGCCGCTTCTCGCCGTCCTC               |
|                            | CGAGAAGGCGGCGCGCGAGCTCAAGCTGCTGCTGC                |
| Construct f                | AAGGAGCGCAACGCCATGATCGAGAAGCAGCTGCGGCGGG           |
|                            | GGCCGCCTTGTCTCTGCGCTCAGGCAACACGCCATCATGG           |
| G12iN primers              |                                                    |
|                            | GCTGCAGTGAAGTCTAGAGCCTGCAGTC                       |
|                            | AGCGCGTCGATCATCTTACTCCGCTCCACCGCC                  |
|                            | GCGGAGTAAGATGATCGACGCGCTGCTGGCCCGCG                |
|                            | CTAGACTCGAGTCACTGCAGCATGATGTCCTTC                  |
